# Supplementary material for: New Multitarget Rivastigmine–Indole Hybrids as Potential Drug Candidates for Alzheimer’s Disease
Source: MDPI journal article supplement (doi:10.3390/pharmaceutics16020281), 2024-02-16
Supplement: s1 [file s1]

## Contents

-Figure S1. <sup>1</sup>HNMR spectra in MeOD-*d*<sub>4</sub> for the final compounds, rivastigmine-indole hybrids (**5a1-3**; **5b1-3**; **5c1-3**)

-Figure S2. <sup>13</sup>CNMR spectra in MeOD-*d*<sub>4</sub> for the final compounds, rivastigmine-indole hybrids (**5a1-3**; **5b1-3**; **5c1-3**)

-Figure S3. Redocking results with superimposition of the crystalized ligand a) donepezil (yellow, PDB code 4EY7 [27]) with the best docked pose within hAChE and b) *N*-((1-(2,3-dihydro-1*H*-inden-2-yl)piperidin-3-yl)methyl)-*N*-(2-methoxyethyl)-2-naphthamide (yellow, PDB code 4TPK [28]) with the best docked pose within hBChE.

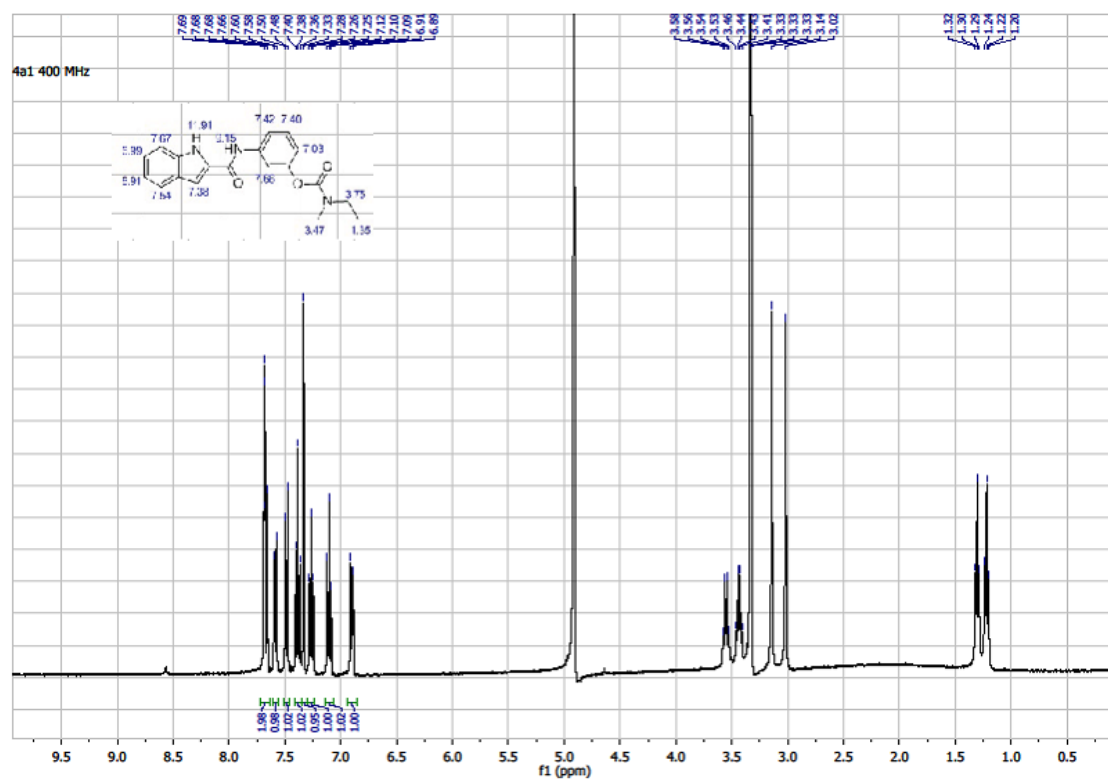

**5a1**

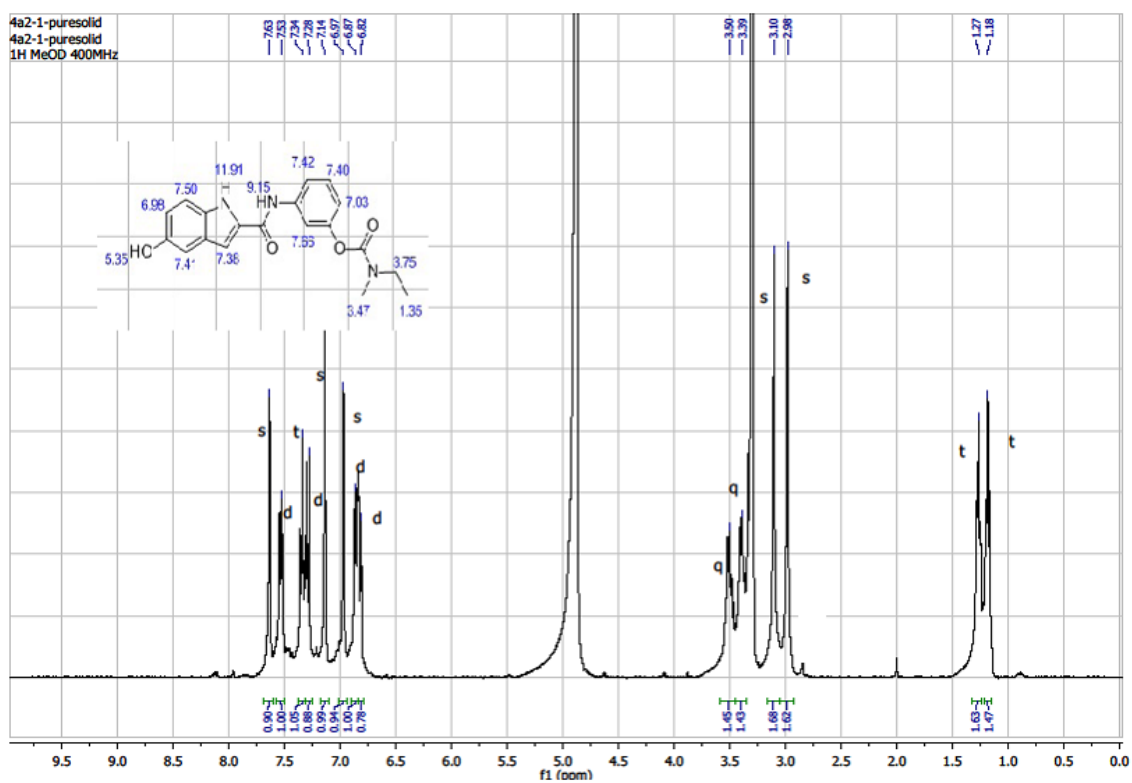

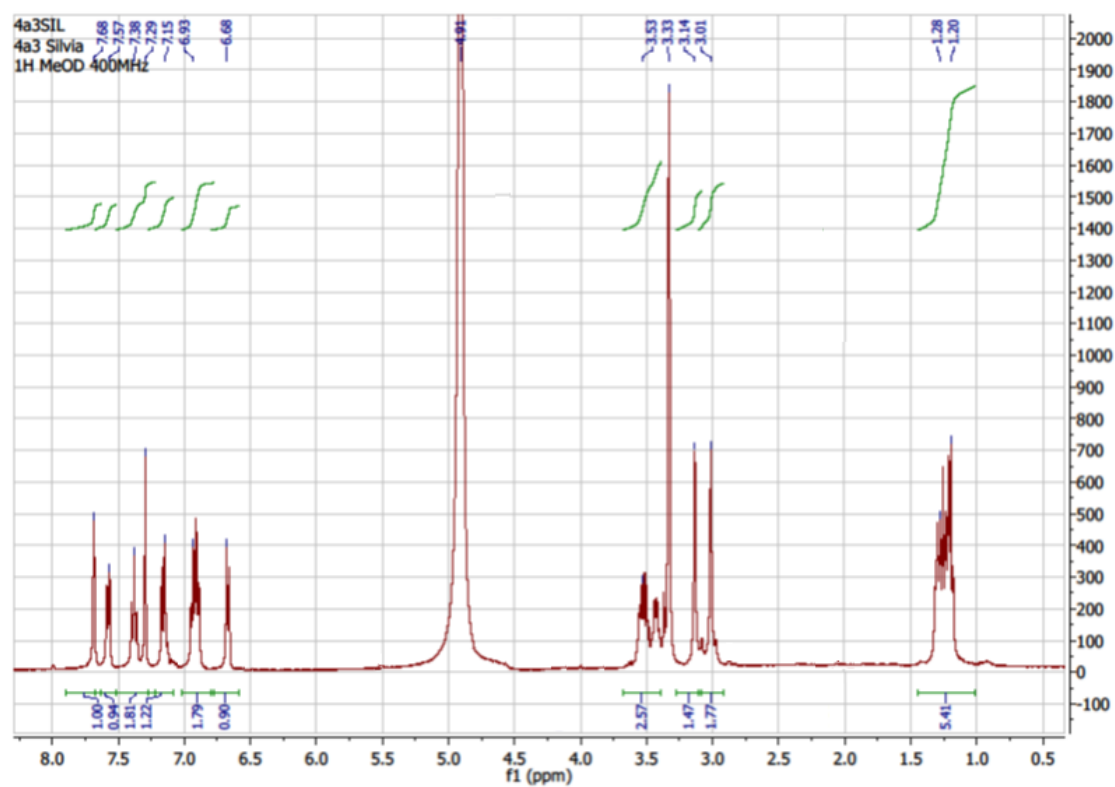

5a3

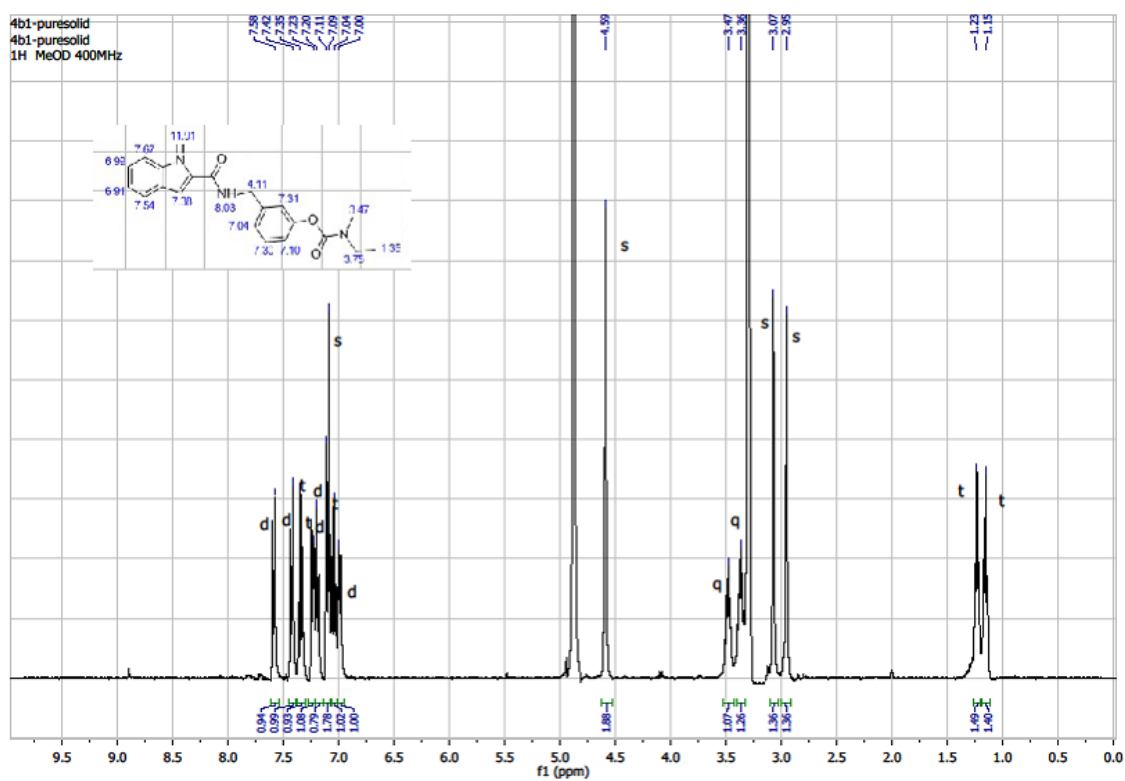

5b1



5b3

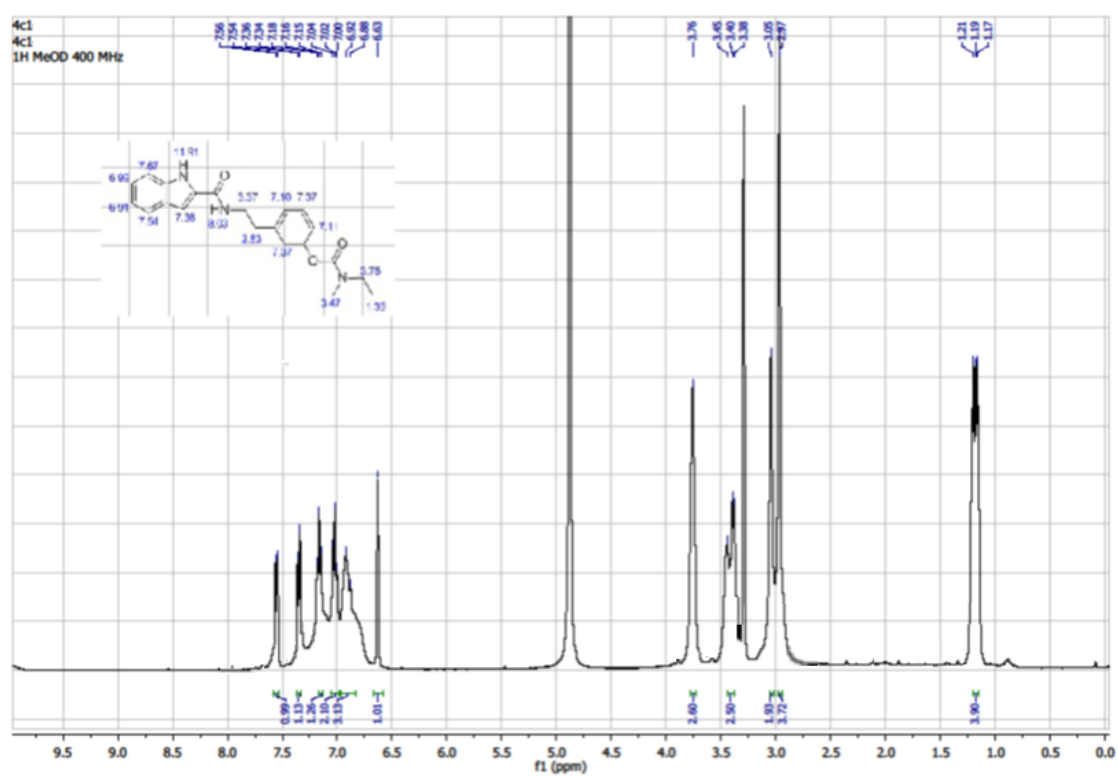

5C1

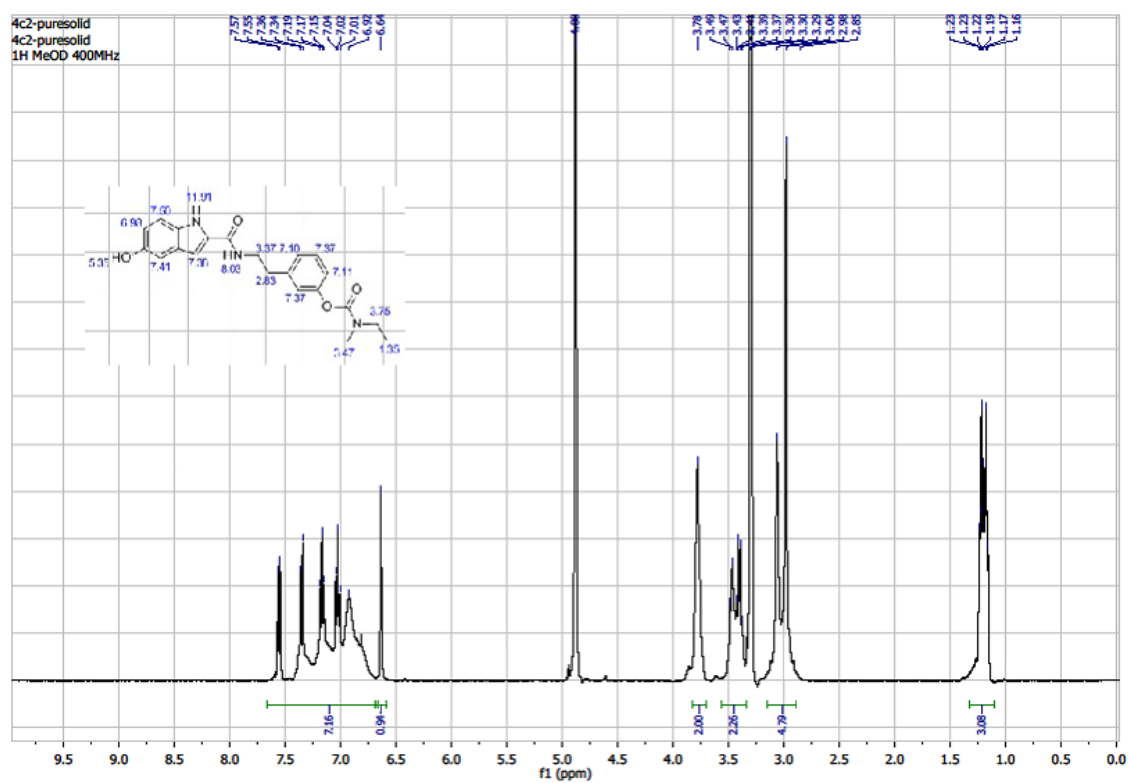

5c2

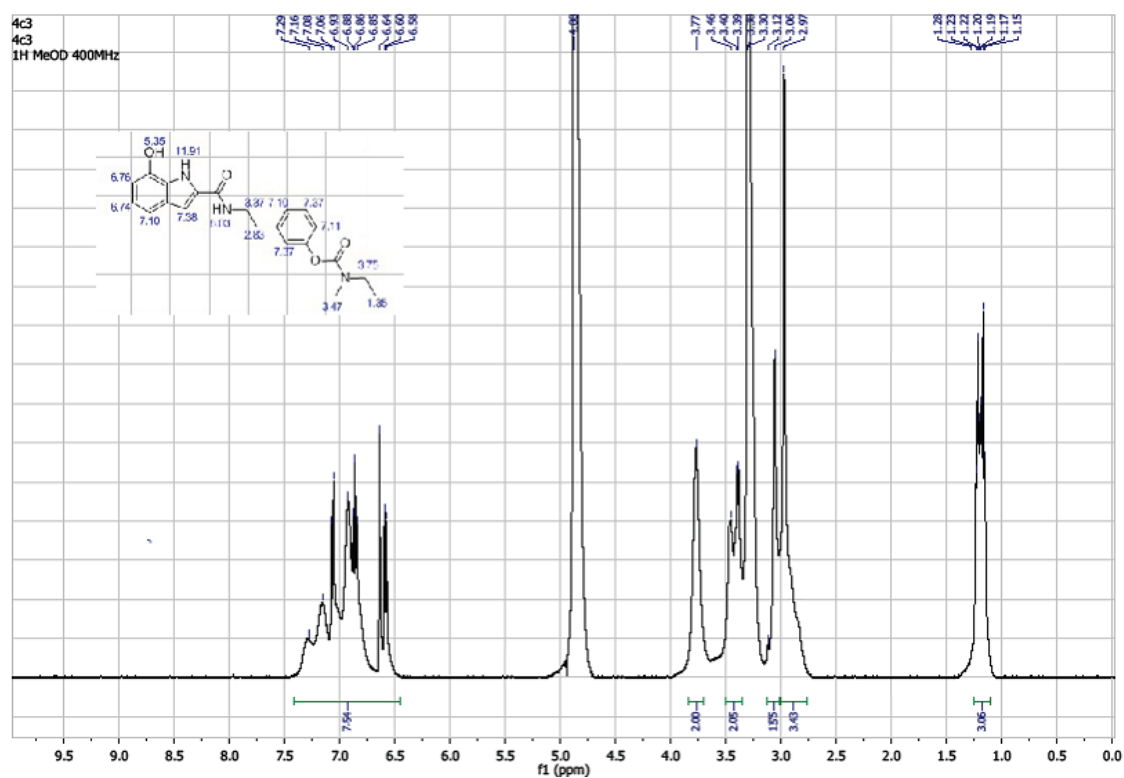

## 5c3

Figure S1. <sup>1</sup>H NMR spectra in MeOD-*d*<sub>4</sub> for the final products, rivastigmine-indole hybrids (**5a1-a3**; **5b1-b3**; **5c1-c3**)

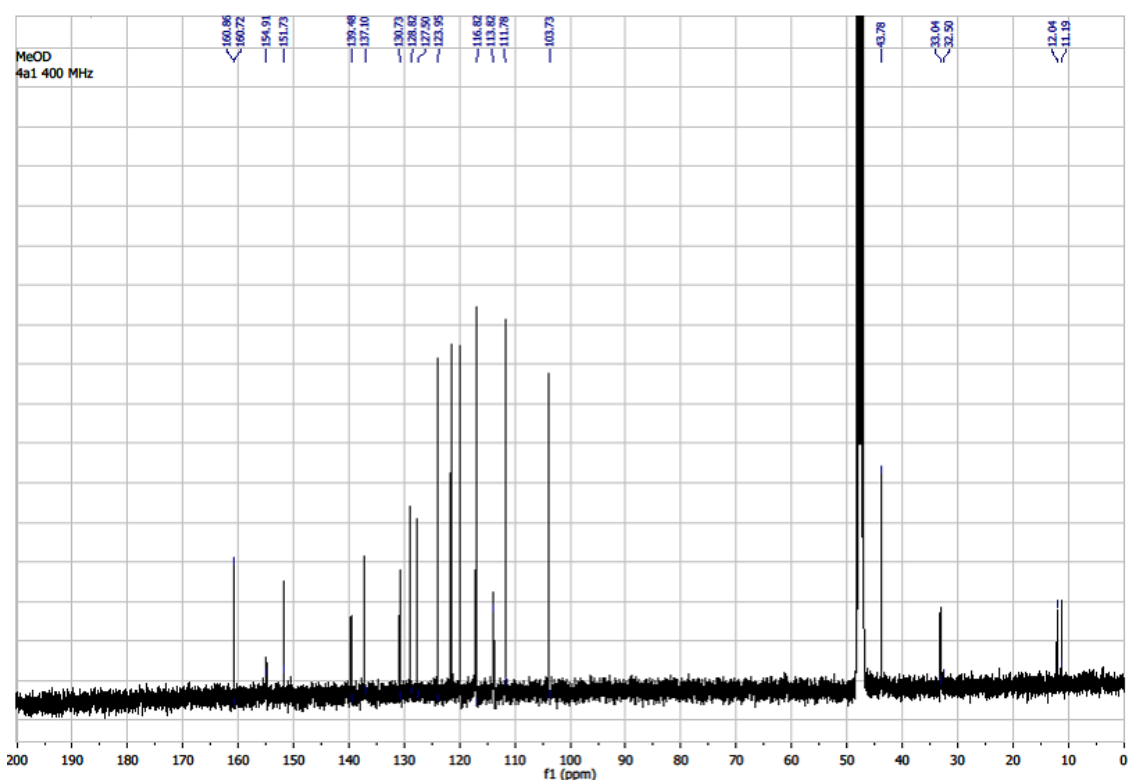

5a1

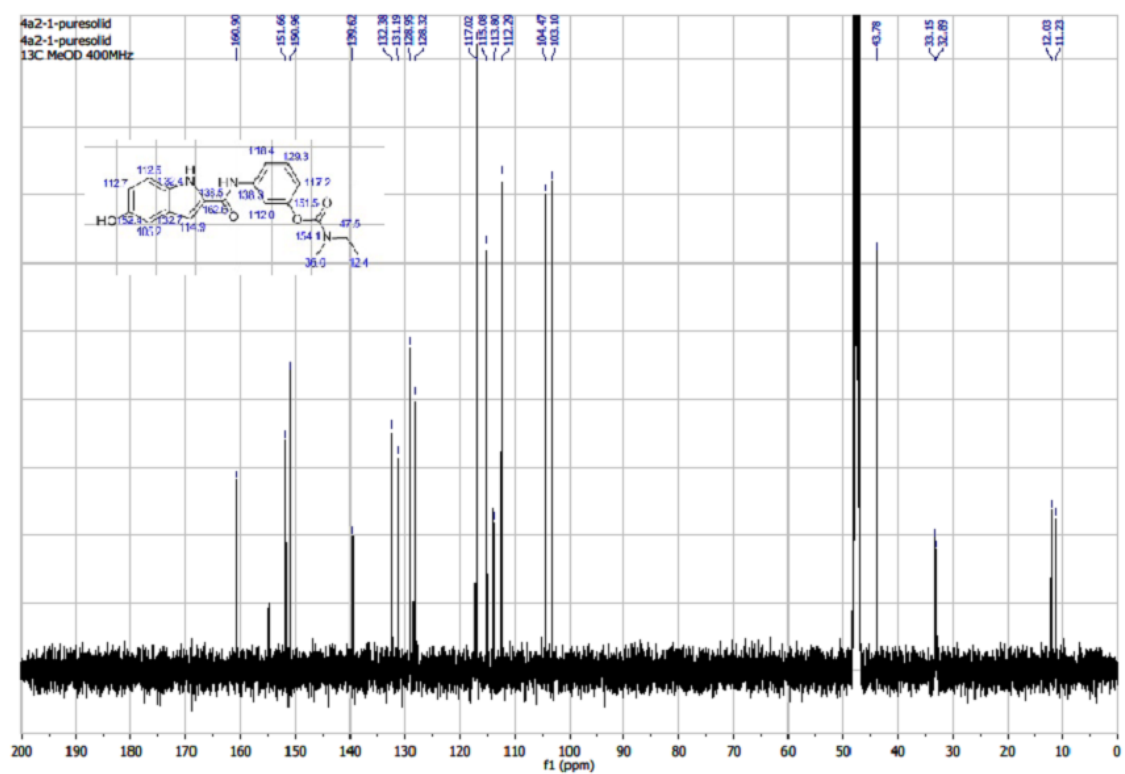

5a2

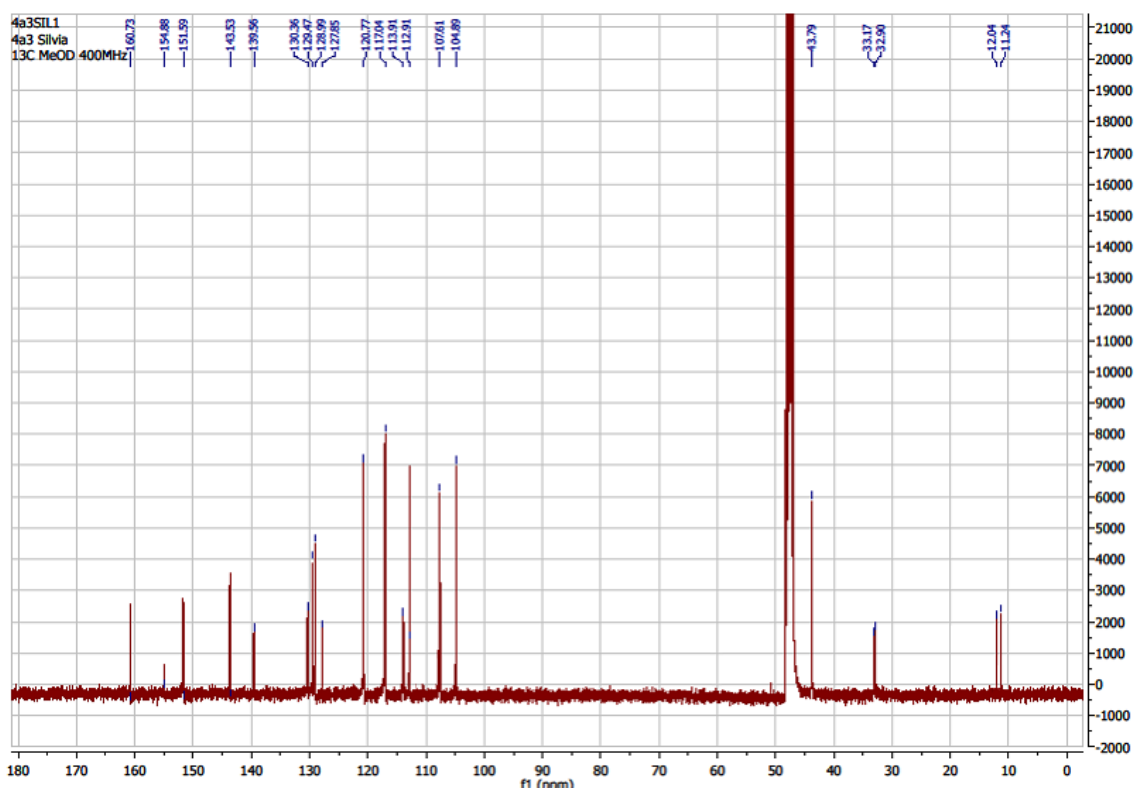

5a3

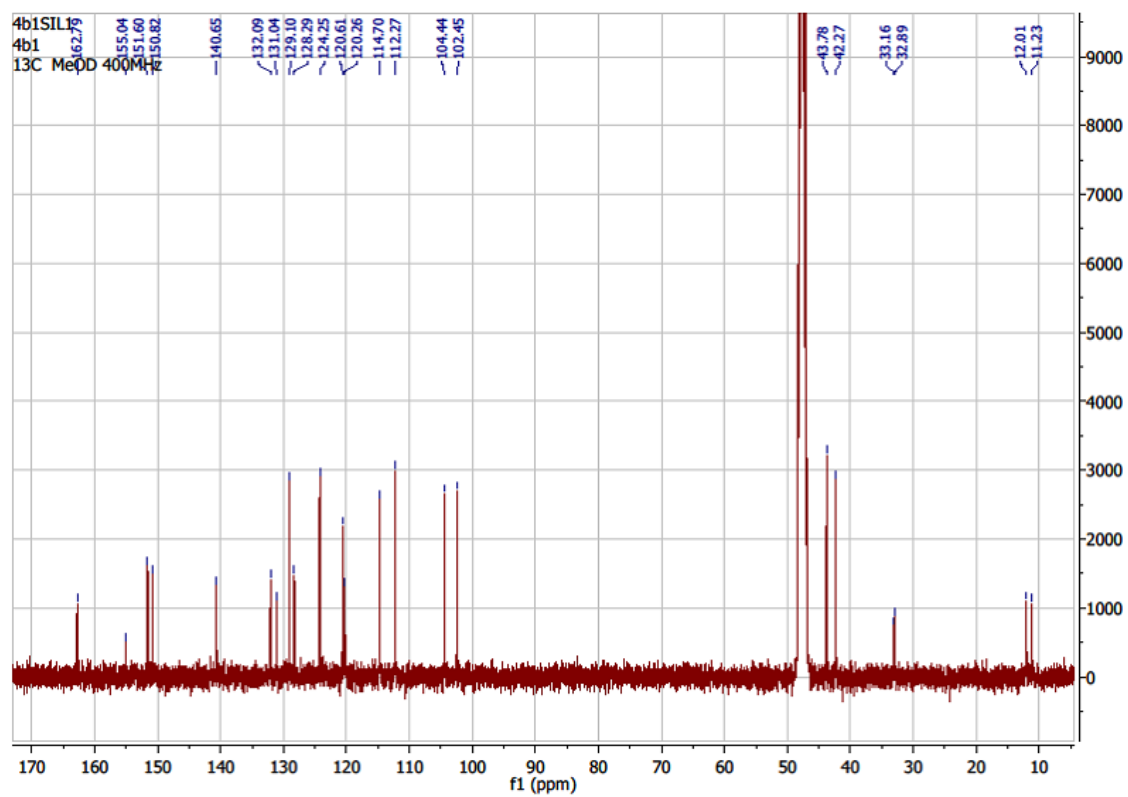

5b1



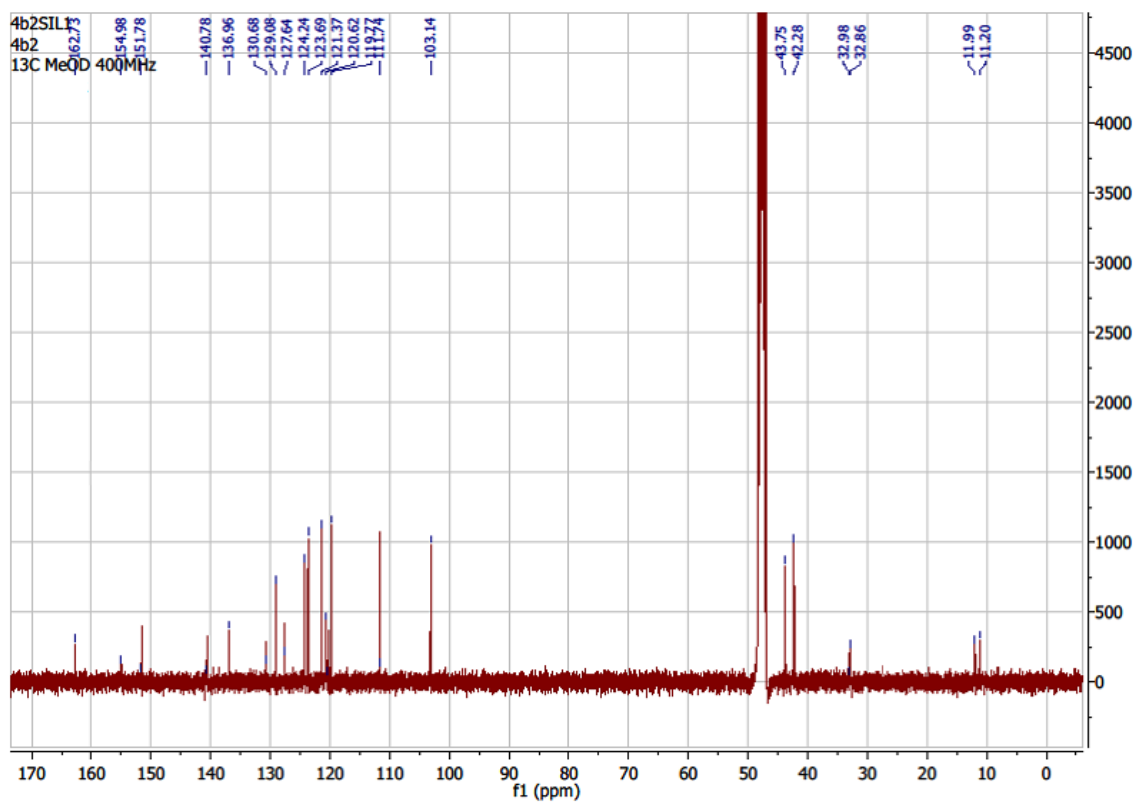

5b2

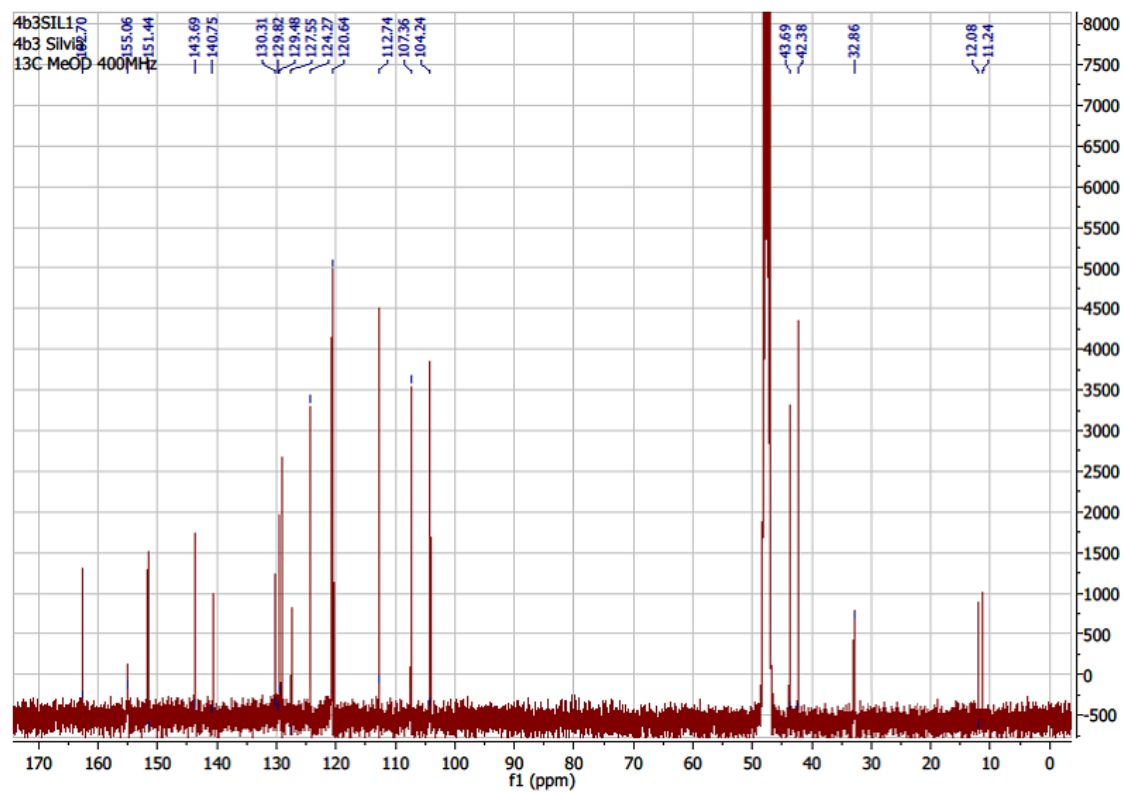

5b3

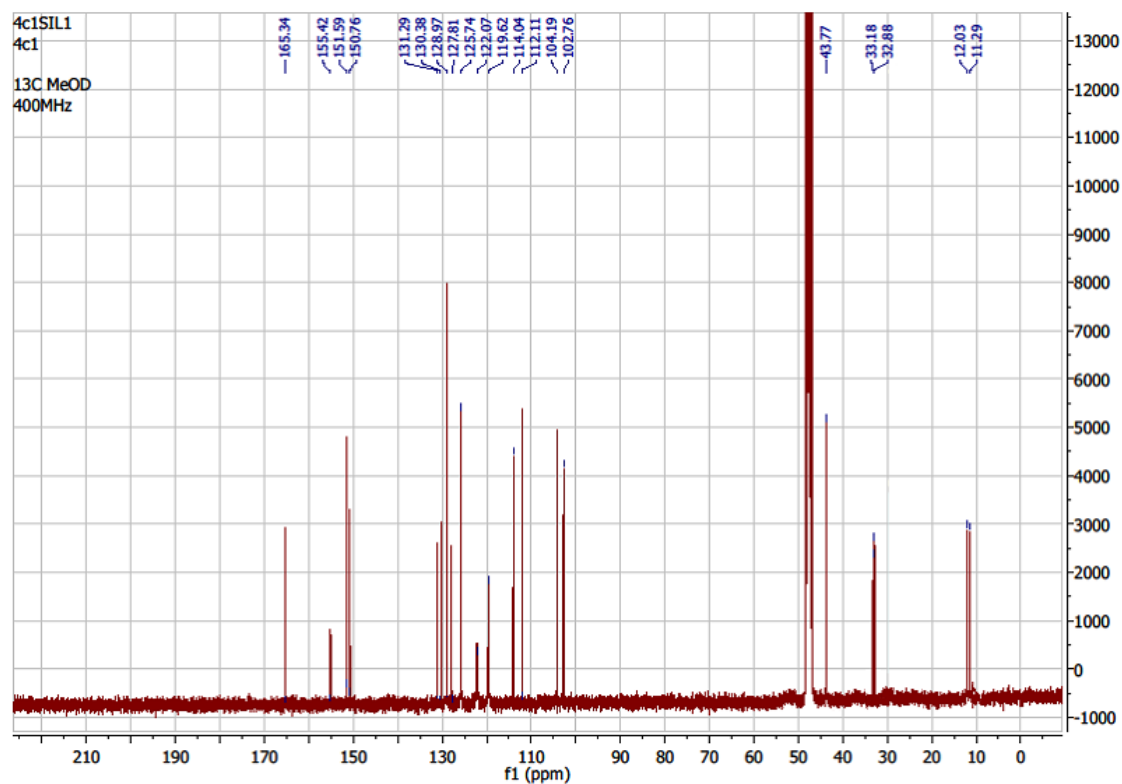

5c1

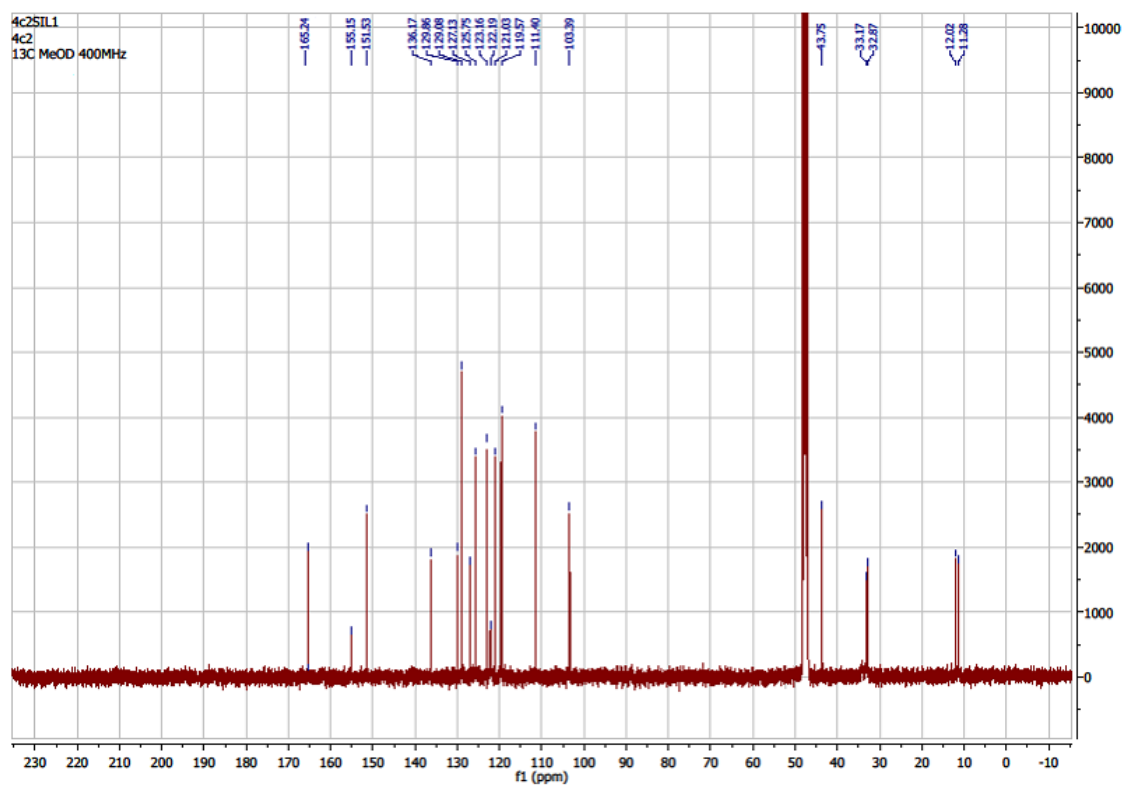

5c2

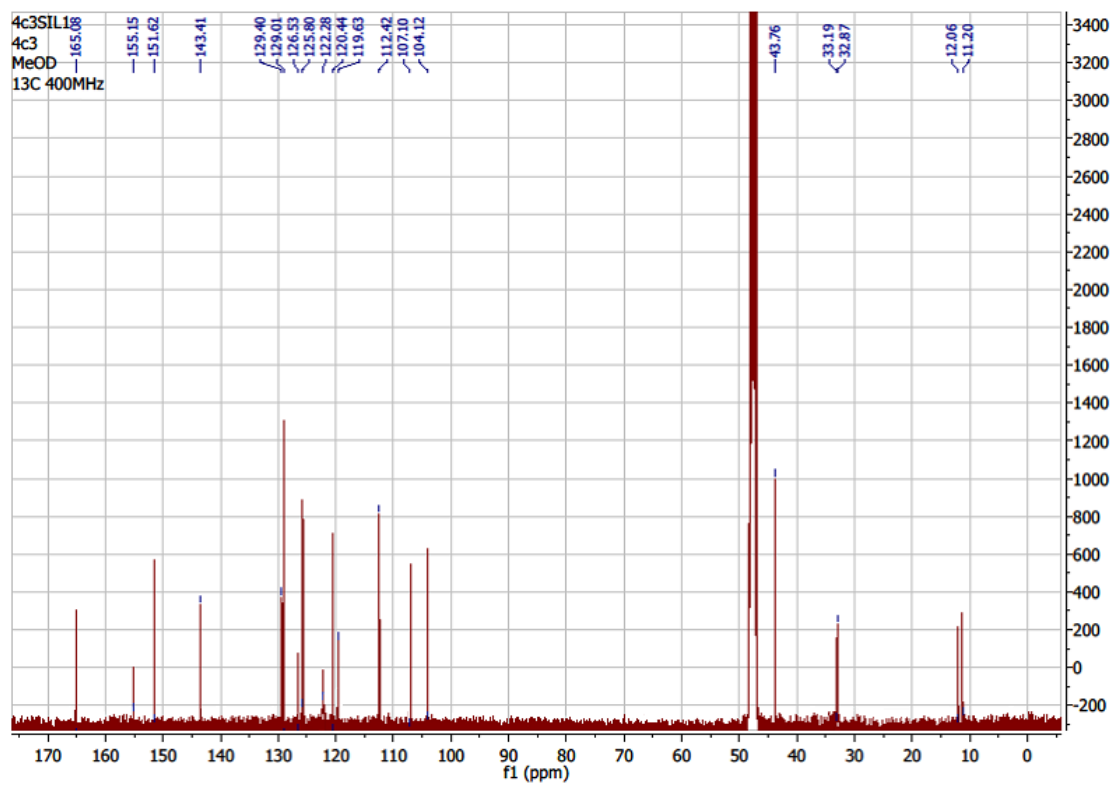

### 5c3

Figure S2.  $^{13}\text{C}$ NMR spectra in  $\text{MeOD-}d_4$  for the final products, rivastigmine-indole hybrids (**5a1-a3**; **5b1-b3**; **5c1-c3**)

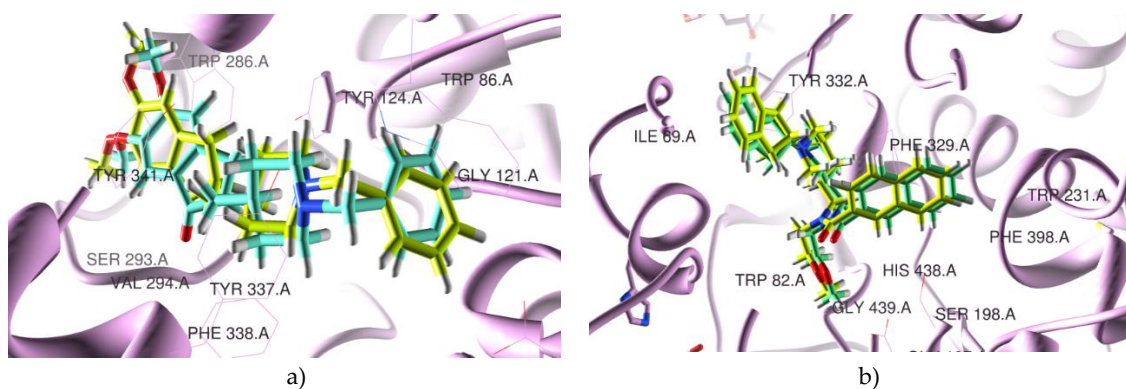

Figure S3. Redocking results with superimposition of the crystalized ligand a) donepezil (yellow, PDB code 4EY7 [27]) with the best docked pose within hAChE and b) *N*-((1-(2,3-dihydro-1*H*-inden-2-yl)piperidin-3-yl)methyl)-*N*-(2-methoxyethyl)-2-naphthamide (yellow, PDB code 4TPK [28]) with the best docked pose within hBChE.

Table S1. Goldscore scoring function values obtained for the RIV-IND hybrids by Gold software [31].

|              |       |       |
|--------------|-------|-------|
| <b>5a1</b>   | 63.37 | 57.10 |
| <b>5a2</b>   | 64.46 | 53.65 |
| <b>5a3</b>   | 63.41 | 56.43 |
| <b>5b1</b>   | 69.36 | 62.81 |
| <b>5b2</b>   | 68.08 | 60.59 |
| <b>5b3</b>   | 68.63 | 60.53 |
| <b>5c1</b>   | 71.28 | 64.55 |
| <b>5c2</b>   | 72.82 | 64.82 |
| <b>5c3</b>   | 69.21 | 65.88 |
| Rivastigmine | 47.07 | 44.28 |
